# Supplementary material
Source: HighWire-hosted journal article supplement (doi:10.1101/rna.078872.121)
Supplement: Supplemental_Figure_Legends.docx [file Supplemental_Figure_Legends.docx]

**Supplemental Figure 1: Other ribonucleases are not downregulated in osteosarcoma cells. A)** Growth curves of HOS, U-2 OS and SAOS-2 cells. Error bars represent SEM, n=3. **B)** qRT-PCR assessment of *XRN2, DIS3, DIS3L1* and *DIS3L2* mRNA in osteosarcoma cell lines relative to the HOb control, normalised to *HPRT1*. Error bars represent SEM, n ≥3, ***=p<0.001, **p=<0.01, *=p<0.05, ns=p>0.05.

**Supplemental Figure 2: Time course of XRN1 knockdown in SAOS-2 cells.** Representative western blot and quantification of all blots in cells treated with siScr (Scambled) or siXRN1 (KD) until 144 hours post transfection. Data presented relative to the paired scrambled control sample on each blot. Error bars represent SEM, n≥3, ***=p<0.001, **=p<0.01, *p<0.05.

**Supplemental Figure 3: Optimisation of SUnSET labelling experiments.** Error bars represent SEM (where n≥3). n≥2.

**Supplemental Figure 4: A)** qRT-PCR quantification of *XRN1* mRNA in each individual RNA-sequencing replicate. Each *XRN1* knockdown replicate shown in pink is compared to its paired scrambled control (Scr) replicate. Mean and SEM shown. **B)** Hierarchical clustering of RNA-sequencing samples following edgeR analysis. **C)** Up- (red) and downregulated (blue) transcripts based on initial edgeR differential expression using genes as a counting method in featureCounts. **D)** Correlation between transcript fold changes between edgeR analyses when either counting at the “gene” or “exon” level with featureCounts. r2=0.91. **E)** MA plot representing fold change in XRN1-depeleted SAOS-2 cells vs transcript expression in control cells coloured by nature of change. **F)** Gene ontology analysis using DAVID and Biological processes level “BPFAT” at highest stringency assessed in individual groups of misregulated transcripts.

**Supplemental Figure 5:**  Correlation between the raw signal as measured on an Odyssey Fc imager of GAPDH and a Total protein stain at different protein concentrations demonstrates the suitability of GAPDH as a loading control. r2=0.9312, n=14.
