# Supplementary material
Source: HighWire-hosted journal article supplement (doi:10.1101/rna.078872.121)
Supplement: Supplemental_file1.xlsx [file Supplemental_file1.xlsx]

## Sheet: Sheet1
Post-transcriptionally upregulated					Transcriptionally upregulated					Post-transcriptionally downregulated					Transcriptionally downregulated
GeneID	Gene name	Fold Change	FDR		GeneID	Gene name	Fold Change	FDR		GeneID	Gene name	Fold Change	FDR		GeneID	Gene name	Fold Change	FDR
ENSG00000237649	KIFC1	15.015	3.96e-06		ENSG00000164082	GRM2	8.86738	7.94e-08		ENSG00000013275	PSMC4	-6.02261	0.00256824		ENSG00000143125	PROK1	-8.16754	0.000158845
ENSG00000108947	EFNB3	7.5062	3.85e-06		ENSG00000236609	ZNF853	8.53452	4.18e-09		ENSG00000114942	EEF1B2	-5.47218	0.000815941		ENSG00000179869	ABCA13	-8.14805	1.63e-11
ENSG00000183798	EMILIN3	7.43778	1.66e-06		ENSG00000078900	TP73	6.82497	1.19e-06		ENSG00000105856	HBP1	-4.98461	0.0125189		ENSG00000133055	MYBPH	-7.18173	6.98e-12
ENSG00000136274	NACAD	5.91716	1.04e-05		ENSG00000166341	DCHS1	6.74374	6.91e-11		ENSG00000169429	CXCL8	-4.56018	0.00132271		ENSG00000137673	MMP7	-6.3206	0.000303476
ENSG00000187867	PALM3	5.3381	0.000127488		ENSG00000130592	LSP1	6.50276	2.33e-09		ENSG00000224163	AC025594.1	-4.09946	0.000509416		ENSG00000228035	NGF-AS1	-6.03636	5.85e-09
ENSG00000264569	DCXR-DT	5.071	9.66e-05		ENSG00000172733	PURG	6.47662	6.61e-09		ENSG00000174255	ZNF80	-4.06195	3.79e-06		ENSG00000260785	CASC17	-5.46611	1.19e-13
ENSG00000186897	C1QL4	4.93803	1.79e-10		ENSG00000088881	EBF4	6.37932	2.7e-10		ENSG00000139330	KERA	-3.79865	4.05e-08		ENSG00000258331	LINC02461	-5.33759	1.29e-07
ENSG00000197457	STMN3	4.62333	0.000610086		ENSG00000141314	RHBDL3	5.79983	2.08e-11		ENSG00000117595	IRF6	-3.45349	5.5e-05		ENSG00000148677	ANKRD1	-5.10786	3.84e-13
ENSG00000246777	AC044802.1	4.34155	0.000109752		ENSG00000141750	STAC2	5.68877	1.42e-08		ENSG00000175701	MTLN	-3.25886	1.09e-09		ENSG00000166396	SERPINB7	-4.8525	4.24e-12
ENSG00000178821	TMEM52	4.11887	0.000605828		ENSG00000165821	SALL2	5.54515	9.84e-09		ENSG00000137168	PPIL1	-3.2126	3.84e-13		ENSG00000174775	HRAS	-4.59994	0.0182698
ENSG00000181104	F2R	4.04406	5.4e-12		ENSG00000129946	SHC2	4.99399	4.11e-07		ENSG00000111843	TMEM14C	-3.12566	0.0346797		ENSG00000147606	SLC26A7	-4.57463	6.29e-07
ENSG00000103723	AP3B2	3.84306	7.23e-05		ENSG00000176884	GRIN1	4.98816	6.03e-05		ENSG00000189052	CGB5	-3.07885	0.000253411		ENSG00000257849	AC012038.2	-4.33491	4.78e-08
ENSG00000240694	PNMA2	3.63892	1.37e-06		ENSG00000198857	HSD3BP5	4.97318	1.79e-10		ENSG00000160588	MPZL3	-3.04769	1.38e-05		ENSG00000138347	MYPN	-4.14649	2.93e-10
ENSG00000227372	TP73-AS1	3.488	0.00294277		ENSG00000164638	SLC29A4	4.87798	4.39e-13		ENSG00000169908	TM4SF1	-3.04569	0.000679514		ENSG00000198074	AKR1B10	-4.10978	5.23e-11
ENSG00000163295	ALPI	3.25703	6.46e-05		ENSG00000228692	AL445307.1	4.8702	6.13e-07		ENSG00000116489	CAPZA1	-3.00886	1.05e-13		ENSG00000143162	CREG1	-4.09619	1.05e-13
ENSG00000159450	TCHH	3.11869	3.02e-06		ENSG00000168743	NPNT	4.73424	7.36e-11		ENSG00000188452	CERKL	-2.94627	1.36e-10		ENSG00000174792	ODAPH	-3.98208	1.96e-07
ENSG00000010319	SEMA3G	3.10332	0.00265795		ENSG00000137841	PLCB2	4.67897	2.49e-09		ENSG00000110344	UBE4A	-2.84196	5.93e-13		ENSG00000257373	AC012038.1	-3.87543	1.05e-11
ENSG00000168505	GBX2	3.02771	0.000150386		ENSG00000006283	CACNA1G	4.64027	7.35e-11		ENSG00000229962	AP000221.1	-2.82666	0.0101269		ENSG00000228208	C1orf143	-3.64851	0.00014716
ENSG00000162510	MATN1	3.01686	0.00103206		ENSG00000114646	CSPG5	4.58527	9.28e-11		ENSG00000159346	ADIPOR1	-2.7364	6.23e-13		ENSG00000183644	C11orf88	-3.623	7.92e-09
ENSG00000005187	ACSM3	2.98454	0.00104163		ENSG00000185477	GPRIN3	4.42511	2.28e-06		ENSG00000114850	SSR3	-2.7149	1.93e-13		ENSG00000106302	HYAL4	-3.60819	4.63e-12
ENSG00000170577	SIX2	2.94486	1.37e-06		ENSG00000132016	C19orf57	4.35841	5.3e-12		ENSG00000006007	GDE1	-2.70051	4.29e-12		ENSG00000137752	CASP1	-3.54044	0.00046378
ENSG00000127533	F2RL3	2.90907	0.000229942		ENSG00000159708	LRRC36	4.33732	1.8e-06		ENSG00000197769	MAP1LC3C	-2.6427	0.000145378		ENSG00000254115	AC090572.3	-3.38907	1.61e-06
ENSG00000173457	PPP1R14B	2.87957	5.71e-13		ENSG00000119630	PGF	4.30965	2.17e-08		ENSG00000197045	GMFB	-2.61919	6.87e-13		ENSG00000105971	CAV2	-3.37598	1.05e-13
ENSG00000099365	STX1B	2.83738	1.38e-05		ENSG00000259363	AC090825.1	4.28279	4.16e-12		ENSG00000152332	UHMK1	-2.61356	1.11e-13		ENSG00000152779	SLC16A12	-3.34842	1.33e-07
ENSG00000283828	AL137002.2	2.83677	1.11e-06		ENSG00000167191	GPRC5B	4.27124	2.86e-06		ENSG00000174021	GNG5	-2.5814	1.05e-13		ENSG00000254980	AP002008.1	-3.31934	0.000821959
ENSG00000285361	AL844170.1	2.77876	0.000767312		ENSG00000131094	C1QL1	4.25585	2.97e-11		ENSG00000158769	F11R	-2.51961	8.73e-05		ENSG00000164266	SPINK1	-3.31767	0.000813606
ENSG00000124767	GLO1	2.75898	1.68e-13		ENSG00000176490	DIRAS1	4.24316	0.000819389		ENSG00000114978	MOB1A	-2.5138	1.05e-13		ENSG00000023839	ABCC2	-3.24032	1.46e-11
ENSG00000160233	LRRC3	2.73174	4.66e-08		ENSG00000129951	PLPPR3	4.24002	1.2e-10		ENSG00000159873	CCDC117	-2.50784	2.06e-13		ENSG00000116299	KIAA1324	-3.23669	7.78e-10
ENSG00000174871	CNIH2	2.72475	1.26e-07		ENSG00000177614	PGBD5	4.18241	2.28e-06		ENSG00000099194	SCD	-2.5073	9.09e-12		ENSG00000237560	LINC01497	-3.22452	2.91e-09
ENSG00000257103	LSM14A	2.70183	5.79e-06		ENSG00000175093	SPSB4	4.17159	1.04e-09		ENSG00000088986	DYNLL1	-2.50462	2.39e-12		ENSG00000253930	TNFRSF10A-AS1	-3.22234	0.000128095
ENSG00000177679	SRRM3	2.69814	8.94e-06		ENSG00000101265	RASSF2	4.15582	1.07e-07		ENSG00000257038	AP002761.3	-2.48905	0.00327625		ENSG00000081051	AFP	-3.12503	0.000187534
ENSG00000270112	AC090241.2	2.69722	6.26e-05		ENSG00000166394	CYB5R2	4.0901	1.96e-08		ENSG00000128989	ARPP19	-2.45861	4.39e-13		ENSG00000206145	P2RX6P	-3.10004	0.00646715
ENSG00000178202	POGLUT3	2.64585	2.3e-13		ENSG00000179331	RAB39A	4.05159	1.69e-11		ENSG00000154545	MAGED4	-2.4572	0.0235244		ENSG00000127325	BEST3	-3.08749	3.12e-09
ENSG00000175084	DES	2.63391	0.0109442		ENSG00000122756	CNTFR	4.04026	1.11e-06		ENSG00000074695	LMAN1	-2.42621	2.3e-13		ENSG00000138356	AOX1	-3.06599	3.66e-08
ENSG00000158050	DUSP2	2.61247	0.00327044		ENSG00000162946	DISC1	4.02689	2.75e-12		ENSG00000196743	GM2A	-2.41749	8.33e-11		ENSG00000065325	GLP2R	-3.05744	2.37e-08
ENSG00000111186	WNT5B	2.60362	3.49e-08		ENSG00000112514	CUTA	4.02478	0.00318566		ENSG00000112078	KCTD20	-2.41699	1.11e-13		ENSG00000138100	TRIM54	-3.04576	5.87e-07
ENSG00000225077	LINC00337	2.58051	0.000116333		ENSG00000092096	SLC22A17	3.98048	4.26e-10		ENSG00000109133	TMEM33	-2.41002	3.33e-13		ENSG00000135535	CD164	-3.04043	4.76e-14
ENSG00000250986	LINC02600	2.57423	0.00609215		ENSG00000168913	ENHO	3.97822	6.67e-10		ENSG00000131791	PRKAB2	-2.37939	1.13e-13		ENSG00000108582	CPD	-3.03894	1.92e-14
ENSG00000187686	KRT18P59	2.5623	0.000801195		ENSG00000186654	PRR5	3.96944	3.84e-07		ENSG00000173918	C1QTNF1	-2.37878	1.07e-10		ENSG00000129354	AP1M2	-3.03265	3.27e-10
ENSG00000067840	PDZD4	2.53322	1.23e-05		ENSG00000225968	ELFN1	3.95721	2.62e-12		ENSG00000151239	TWF1	-2.37626	8.3e-13		ENSG00000082293	COL19A1	-3.02693	0.000188775
ENSG00000108852	MPP2	2.53063	1.7e-10		ENSG00000158813	EDA	3.94355	8.68e-10		ENSG00000100568	VTI1B	-2.32888	2.09e-11		ENSG00000236751	LINC01186	-3.01632	1.41e-10
ENSG00000173825	TIGD3	2.46161	0.000139698		ENSG00000158008	EXTL1	3.8981	3.53e-06		ENSG00000117152	RGS4	-2.31693	1.13e-05		ENSG00000169715	MT1E	-3.01399	1.07e-11
ENSG00000154134	ROBO3	2.45599	3.43e-05		ENSG00000274253	AC138649.1	3.8781	1.15e-07		ENSG00000110958	PTGES3	-2.31109	7.21e-13		ENSG00000233834	AC005083.1	-2.98665	1.61e-05
ENSG00000136159	NUDT15	2.43736	5.48e-10		ENSG00000132563	REEP2	3.85639	8.07e-07		ENSG00000152778	IFIT5	-2.30878	7.36e-12		ENSG00000184012	TMPRSS2	-2.96993	9.24e-11
ENSG00000138083	SIX3	2.41425	0.00293107		ENSG00000166831	RBPMS2	3.85461	3.33e-10		ENSG00000100216	TOMM22	-2.30101	2.42e-11		ENSG00000179046	TRIML2	-2.96164	0.00025627
ENSG00000230927	TMBIM7P	2.4067	1.6e-05		ENSG00000087085	ACHE	3.83893	3.72e-05		ENSG00000213064	SFT2D2	-2.29067	1.73e-12		ENSG00000089692	LAG3	-2.96068	4.48e-06
ENSG00000107736	CDH23	2.40596	1.02e-07		ENSG00000116962	NID1	3.82082	6.3e-15		ENSG00000137575	SDCBP	-2.29019	1.73e-12		ENSG00000183625	CCR3	-2.95968	5.17e-11
ENSG00000113083	LOX	2.39304	0.00041091		ENSG00000075461	CACNG4	3.79503	1.34e-11		ENSG00000180901	KCTD2	-2.28979	4.23e-13		ENSG00000133048	CHI3L1	-2.94632	1.46e-07
ENSG00000254726	MEX3A	2.38104	8.45e-13		ENSG00000153406	NMRAL1	3.76833	0.00555332		ENSG00000143799	PARP1	-2.28966	2.49e-13		ENSG00000123342	MMP19	-2.93839	1.09e-06
ENSG00000174576	NPAS4	2.37329	0.00115475		ENSG00000128011	LRFN1	3.76125	1.72e-06		ENSG00000152785	BMP3	-2.28704	0.000135259		ENSG00000102312	PORCN	-2.8975	1.26e-09
ENSG00000274397	AL357153.4	2.37205	0.00419214		ENSG00000126218	F10	3.74921	2.49e-08		ENSG00000221963	APOL6	-2.28318	1.69e-12		ENSG00000042753	AP2S1	-2.89095	4.39e-13
ENSG00000079337	RAPGEF3	2.36903	8.82e-05		ENSG00000115596	WNT6	3.73902	9.13e-11		ENSG00000115232	ITGA4	-2.27499	2.38e-10		ENSG00000258583	LINC01500	-2.86727	7.91e-11
ENSG00000171560	FGA	2.35781	0.0105628		ENSG00000125510	OPRL1	3.70396	4.63e-06		ENSG00000086598	TMED2	-2.27266	3.84e-13		ENSG00000197181	PIWIL2	-2.86378	1.91e-08
ENSG00000016391	CHDH	2.35192	1.2e-06		ENSG00000104888	SLC17A7	3.69135	2.03e-08		ENSG00000005700	IBTK	-2.27013	0.000540236		ENSG00000101670	LIPG	-2.77107	2.14e-12
ENSG00000108830	RND2	2.33553	0.00420404		ENSG00000185386	MAPK11	3.67206	0.000230745		ENSG00000224208	AL590762.3	-2.25	0.000124615		ENSG00000258998	LINC02302	-2.76318	2.23e-11
ENSG00000206013	IFITM5	2.32852	0.0010505		ENSG00000153208	MERTK	3.60527	2.02e-12		ENSG00000155858	LSM11	-2.2451	8.46e-12		ENSG00000204176	SYT15	-2.75718	0.00511841
ENSG00000188816	HMX2	2.32759	0.0109078		ENSG00000105711	SCN1B	3.59991	3.27e-08		ENSG00000115339	GALNT3	-2.24118	6.9e-09		ENSG00000165898	ISCA2	-2.74844	9.48e-11
ENSG00000152076	CCDC74B	2.32362	0.0310423		ENSG00000003249	DBNDD1	3.59664	4.87e-08		ENSG00000136021	SCYL2	-2.2338	2.46e-12		ENSG00000169085	VXN	-2.74288	1.57e-06
ENSG00000160161	CILP2	2.31476	7.45e-06		ENSG00000131650	KREMEN2	3.55826	1.31e-06		ENSG00000133878	DUSP26	-2.231	0.00131876		ENSG00000118785	SPP1	-2.73235	0.000240287
ENSG00000160460	AC020929.1	2.30951	4.24e-06		ENSG00000100292	HMOX1	3.5534	4.73e-10		ENSG00000185418	TARS3	-2.22783	1.05e-11		ENSG00000118503	TNFAIP3	-2.73192	1.17e-06
ENSG00000224046	AC005076.2	2.30729	1.94e-05		ENSG00000079308	TNS1	3.54721	9.41e-07		ENSG00000139433	GLTP	-2.19445	9.3e-12		ENSG00000213030	CGB8	-2.73185	3.16e-06
ENSG00000130208	APOC1	2.29754	0.00128465		ENSG00000181856	SLC2A4	3.54098	1.66e-05		ENSG00000149923	PPP4C	-2.18726	1.44e-11		ENSG00000023445	BIRC3	-2.72284	2.27e-06
ENSG00000179583	CIITA	2.28234	4.03e-07		ENSG00000167971	CASKIN1	3.53798	2.25e-05		ENSG00000069122	ADGRF5	-2.18406	0.00404243		ENSG00000196754	S100A2	-2.7169	1.32e-12
ENSG00000183476	SH2D7	2.27864	4.17e-05		ENSG00000159733	ZFYVE28	3.5035	2.55e-07		ENSG00000102195	GPR50	-2.18134	0.00212953		ENSG00000137707	BTG4	-2.70596	1.04e-07
ENSG00000155961	RAB39B	2.27196	0.000269328		ENSG00000240280	TCAM1P	3.47285	8.92e-10		ENSG00000131471	AOC3	-2.17635	0.0133735		ENSG00000126838	PZP	-2.69362	6.29e-12
ENSG00000229582	AL358074.1	2.24312	0.012706		ENSG00000174343	CHRNA9	3.45266	1.93e-08		ENSG00000172031	EPHX4	-2.17514	1.25e-08		ENSG00000112378	PERP	-2.69339	1.54e-11
ENSG00000175414	ARL10	2.2395	1.32e-11		ENSG00000161835	GRASP	3.452	3.46e-06		ENSG00000256069	A2MP1	-2.17168	2.05e-09		ENSG00000182732	RGS6	-2.68792	4.38e-09
ENSG00000258777	HIF1A-AS1	2.23393	4.01e-05		ENSG00000163040	CCDC74A	3.42394	7.88e-07		ENSG00000123338	NCKAP1L	-2.1663	0.00560467		ENSG00000164855	TMEM184A	-2.66615	8.84e-10
ENSG00000197380	DACT3	2.22931	3.35e-07		ENSG00000102879	CORO1A	3.42106	9.52e-08		ENSG00000144843	ADPRH	-2.14955	0.0133219		ENSG00000186439	TRDN	-2.66515	1.99e-12
ENSG00000105613	MAST1	2.22576	0.00229656		ENSG00000124191	TOX2	3.39761	4.25e-07		ENSG00000283646	LINC02009	-2.146	0.00107361		ENSG00000259727	AC103740.2	-2.64575	1.34e-07
ENSG00000233098	CCDC144NL-AS1	2.21359	7.31e-06		ENSG00000184194	GPR173	3.37625	5.16e-06		ENSG00000160113	NR2F6	-2.14398	1.21e-11		ENSG00000175548	ALG10B	-2.64297	6.43e-11
ENSG00000226636	AC006020.1	2.21252	0.0044069		ENSG00000103647	CORO2B	3.36045	4.36e-09		ENSG00000167778	SPRYD3	-2.14211	6.98e-12		ENSG00000238290	AL034417.3	-2.64032	2.6e-10
ENSG00000104998	IL27RA	2.21069	2.07e-08		ENSG00000227082	LINC02798	3.30715	5.76e-11		ENSG00000038274	MAT2B	-2.13737	2.83e-12		ENSG00000173641	HSPB7	-2.62776	6.73e-12
ENSG00000168268	NT5DC2	2.2057	8.46e-12		ENSG00000074211	PPP2R2C	3.28069	1.19e-10		ENSG00000074800	ENO1	-2.13019	1.51e-12		ENSG00000137642	SORL1	-2.62116	1.69e-06
ENSG00000134363	FST	2.20316	1.1e-08		ENSG00000156206	CFAP161	3.25033	1.97e-12		ENSG00000138772	ANXA3	-2.12568	1e-06		ENSG00000064787	BCAS1	-2.6061	0.000139274
ENSG00000184905	TCEAL2	2.19104	0.000173407		ENSG00000152931	PART1	3.22184	4.47e-07		ENSG00000104763	ASAH1	-2.1165	1.08e-11		ENSG00000171051	FPR1	-2.59907	7.23e-08
ENSG00000103710	RASL12	2.17872	2.5e-08		ENSG00000135643	KCNMB4	3.21246	2.93e-08		ENSG00000124145	SDC4	-2.1137	1.81e-12		ENSG00000110092	CCND1	-2.59462	2.78e-05
ENSG00000108406	DHX40	2.1744	6.98e-12		ENSG00000137709	POU2F3	3.2059	8.16e-11		ENSG00000013588	GPRC5A	-2.11008	5.15e-11		ENSG00000168685	IL7R	-2.55265	2.39e-11
ENSG00000237753	AC079922.2	2.17417	3.62e-06		ENSG00000100605	ITPK1	3.20504	0.00142538		ENSG00000186951	PPARA	-2.10993	7.11e-12		ENSG00000171992	SYNPO	-2.55084	1.21e-11
ENSG00000134802	SLC43A3	2.17361	0.000109072		ENSG00000164742	ADCY1	3.15633	2.72e-08		ENSG00000184432	COPB2	-2.10675	1.53e-12		ENSG00000186081	KRT5	-2.5115	4.13e-05
ENSG00000205634	LINC00898	2.16986	0.00243685		ENSG00000204044	SLC12A5-AS1	3.13239	3.22e-07		ENSG00000134684	YARS1	-2.09935	2.79e-12		ENSG00000026751	SLAMF7	-2.5022	2.75e-06
ENSG00000174684	B4GAT1	2.16675	2.92e-10		ENSG00000168243	GNG4	3.12877	9.36e-09		ENSG00000123575	FAM199X	-2.09628	1.25e-12		ENSG00000065427	KARS1	-2.4938	4.39e-13
ENSG00000259548	AC021483.1	2.16613	0.00417399		ENSG00000214796	AC098934.1	3.10319	4.4e-10		ENSG00000172795	DCP2	-2.09306	2.37e-12		ENSG00000183840	GPR39	-2.47933	9.28e-11
ENSG00000149380	P4HA3	2.16254	3.85e-10		ENSG00000161082	CELF5	3.05867	0.00019764		ENSG00000174840	PDE12	-2.09064	1.5e-10		ENSG00000226453	LINC02542	-2.47424	2.56e-11
ENSG00000172731	LRRC20	2.16047	1.31e-10		ENSG00000162878	PKDCC	3.05815	8.01e-06		ENSG00000139324	TMTC3	-2.09014	4.37e-13		ENSG00000157191	NECAP2	-2.46191	1.32e-12
ENSG00000250687	NAIPP1	2.15966	0.0183368		ENSG00000125744	RTN2	3.05592	4.31e-05		ENSG00000163545	NUAK2	-2.08151	2.04e-09		ENSG00000131475	VPS25	-2.44941	3.1e-11
ENSG00000109063	MYH3	2.15905	4e-06		ENSG00000003137	CYP26B1	3.05373	3.33e-07		ENSG00000131015	ULBP2	-2.07957	1.77e-09		ENSG00000138395	CDK15	-2.44364	2.51e-11
ENSG00000205037	AC134312.1	2.15484	0.00364355		ENSG00000160867	FGFR4	3.04646	1.57e-06		ENSG00000169752	NRG4	-2.07955	8.1e-07		ENSG00000018625	ATP1A2	-2.43407	1.63e-08
ENSG00000130717	UCK1	2.13199	5.38e-12		ENSG00000170049	KCNAB3	3.03239	3.14e-10		ENSG00000125651	GTF2F1	-2.07582	8.46e-12		ENSG00000132824	SERINC3	-2.42829	4.61e-13
ENSG00000247746	USP51	2.13075	4.11e-10		ENSG00000152284	TCF7L1	3.01525	2.21e-10		ENSG00000185825	BCAP31	-2.07275	2.41e-12		ENSG00000224367	OACYLP	-2.38299	2.61e-07
ENSG00000169105	CHST14	2.12656	1.16e-10		ENSG00000131771	PPP1R1B	3.01413	2.53e-07		ENSG00000003436	TFPI	-2.07178	0.0240187		ENSG00000112414	ADGRG6	-2.38171	1.78e-05
ENSG00000146250	PRSS35	2.12019	0.00104144		ENSG00000257335	MGAM	3.00658	2.75e-07		ENSG00000204161	TMEM273	-2.06884	0.00106129		ENSG00000197565	COL4A6	-2.37511	1.59e-06
ENSG00000253304	TMEM200B	2.11766	0.000235367		ENSG00000140848	CPNE2	3.00279	2.31e-13		ENSG00000164924	YWHAZ	-2.0619	1.83e-12		ENSG00000231298	MANCR	-2.33259	1.03e-07
ENSG00000228630	HOTAIR	2.10841	0.000665265		ENSG00000267466	AC021683.1	2.99854	1.04e-08		ENSG00000128510	CPA4	-2.05405	1.11e-08		ENSG00000099957	P2RX6	-2.31911	2.02e-08
ENSG00000180998	GPR137C	2.10256	7.11e-12		ENSG00000182272	B4GALNT4	2.99648	1.36e-08		ENSG00000175348	TMEM9B	-2.04791	3.28e-11		ENSG00000147573	TRIM55	-2.30823	0.000814241
ENSG00000140323	DISP2	2.09663	1.06e-09		ENSG00000226472	AC008013.2	2.98658	3.08e-10		ENSG00000137959	IFI44L	-2.03475	1.1e-10		ENSG00000183283	DAZAP2	-2.29078	3.59e-12
ENSG00000165521	EML5	2.09615	2.07e-05		ENSG00000225588	AC096669.1	2.96541	1.24e-10		ENSG00000254702	AP002353.1	-2.02492	0.000624544		ENSG00000232938	RPL23AP87	-2.28954	0.00118094
ENSG00000128564	VGF	2.09468	5.54e-07		ENSG00000267506	AC021683.2	2.95513	1.99e-10		ENSG00000171860	C3AR1	-2.0237	2.18e-06		ENSG00000167588	GPD1	-2.2882	0.00039645
ENSG00000234062	AL390879.1	2.09448	1.46e-09		ENSG00000261024	AL078644.1	2.95426	3.17e-08		ENSG00000164509	IL31RA	-2.01878	1.85e-11		ENSG00000179304	FAM156B	-2.26243	0.0115518
ENSG00000084636	COL16A1	2.09354	6.7e-09		ENSG00000198108	CHSY3	2.95273	3.84e-13		ENSG00000126767	ELK1	-2.01618	7.56e-12		ENSG00000205336	ADGRG1	-2.19334	4.06e-09
ENSG00000237976	AL391069.2	2.08955	0.000639304		ENSG00000115461	IGFBP5	2.92428	8.21e-12		ENSG00000173198	CYSLTR1	-2.00231	0.0169108		ENSG00000152137	HSPB8	-2.1907	9.92e-12
ENSG00000181418	DDN	2.08927	0.000206306		ENSG00000054356	PTPRN	2.92122	1.51e-09							ENSG00000158109	TPRG1L	-2.16359	1.03e-10
ENSG00000225614	ZNF469	2.08587	8.3e-07		ENSG00000074370	ATP2A3	2.91194	0.000114186							ENSG00000185215	TNFAIP2	-2.15566	8.3e-13
ENSG00000003989	SLC7A2	2.07819	7.4e-12		ENSG00000074276	CDHR2	2.91037	9.76e-08							ENSG00000236921	AL157937.1	-2.1416	6.25e-10
ENSG00000144619	CNTN4	2.07534	7.07e-08		ENSG00000167680	SEMA6B	2.91001	9.42e-11							ENSG00000236444	UBE2L5	-2.14052	0.000840517
ENSG00000130813	SHFL	2.0718	0.000122046		ENSG00000123560	PLP1	2.90986	5e-07							ENSG00000005884	ITGA3	-2.13441	3.55e-13
ENSG00000135519	KCNH3	2.07161	4.25e-06		ENSG00000226508	LINC01918	2.90764	1.35e-05							ENSG00000197893	NRAP	-2.12741	2.73e-08
ENSG00000133216	EPHB2	2.0652	9.87e-11		ENSG00000185950	IRS2	2.9038	4.08e-06							ENSG00000206053	JPT2	-2.12732	3.84e-13
ENSG00000105227	PRX	2.06361	3.61e-07		ENSG00000183873	SCN5A	2.89591	6.11e-10							ENSG00000142871	CCN1	-2.12717	2.26e-11
ENSG00000271803	AL121906.1	2.06318	0.000340161		ENSG00000161860	SYCE2	2.8929	0.00281396							ENSG00000185860	CCDC190	-2.12168	5.47e-07
ENSG00000186642	PDE2A	2.06315	0.000280057		ENSG00000111886	GABRR2	2.87867	3.73e-10							ENSG00000129474	AJUBA	-2.11216	2.25e-07
ENSG00000151640	DPYSL4	2.05926	1.65e-11		ENSG00000214357	NEURL1B	2.87341	2.84e-11							ENSG00000163075	CFAP221	-2.10999	3.8e-05
ENSG00000187123	LYPD6	2.05891	2.47e-11		ENSG00000006047	YBX2	2.87208	0.00232685							ENSG00000163792	TCF23	-2.10898	0.000161222
ENSG00000178226	PRSS36	2.05867	0.00401371		ENSG00000182379	NXPH4	2.86903	1.57e-05							ENSG00000169247	SH3TC2	-2.10005	6.41e-08
ENSG00000155066	PROM2	2.05636	0.000935874		ENSG00000131196	NFATC1	2.86345	4.98e-05							ENSG00000113578	FGF1	-2.08478	4.01e-06
ENSG00000155754	C2CD6	2.04978	4.57e-06		ENSG00000126878	AIF1L	2.85829	3.98e-08							ENSG00000156463	SH3RF2	-2.08436	4.99e-13
ENSG00000251002	AC244502.1	2.04912	4.02e-07		ENSG00000228203	RNF144A-AS1	2.85467	1.09e-05							ENSG00000164342	TLR3	-2.07895	1.14e-05
ENSG00000162687	KCNT2	2.04595	2.08e-06		ENSG00000221947	XKR9	2.84308	7.62e-11							ENSG00000105929	ATP6V0A4	-2.07759	0.000842944
ENSG00000132819	RBM38	2.04548	1.92e-09		ENSG00000074181	NOTCH3	2.83193	1.28e-10							ENSG00000108448	TRIM16L	-2.07018	3.19e-11
ENSG00000144115	THNSL2	2.04373	0.00376727		ENSG00000130720	FIBCD1	2.82392	4.1e-08							ENSG00000198542	ITGBL1	-2.03724	4.29e-09
ENSG00000228486	C2orf92	2.03702	8.44e-10		ENSG00000138030	KHK	2.82038	4.71e-06							ENSG00000138311	ZNF365	-2.035	3.83e-11
ENSG00000013725	CD6	2.0364	0.000821986		ENSG00000100167	SEPTIN3	2.80301	5.31e-05							ENSG00000145287	PLAC8	-2.0227	7.15e-12
ENSG00000188039	NWD1	2.03612	3.14e-06		ENSG00000137076	TLN1	2.79186	2.64e-13
ENSG00000164588	HCN1	2.03507	3.32e-07		ENSG00000183760	ACP7	2.78292	4.12e-05
ENSG00000285018	AC245140.3	2.03501	0.000324716		ENSG00000137285	TUBB2B	2.77964	1.19e-09
ENSG00000157827	FMNL2	2.03089	7.99e-10		ENSG00000173227	SYT12	2.76759	3.64e-09
ENSG00000180448	AC004151.1	2.02692	6.8e-09		ENSG00000106804	C5	2.7649	7.11e-12
ENSG00000228016	RAPGEF4-AS1	2.02533	1.11e-08		ENSG00000188322	SBK1	2.75884	4.89e-07
ENSG00000090238	YPEL3	2.02337	1.93e-09		ENSG00000087258	GNAO1	2.75158	1.08e-05
ENSG00000082458	DLG3	2.02234	0.000576042		ENSG00000130005	GAMT	2.74209	7.83e-11
ENSG00000152784	PRDM8	2.01854	0.0116606		ENSG00000181045	SLC26A11	2.73953	4.59e-09
ENSG00000267390	AC036176.1	2.01594	0.00123411		ENSG00000149599	DUSP15	2.73533	6.22e-06
ENSG00000257890	AC011595.2	2.01589	0.000296061		ENSG00000171126	KCNG3	2.73122	1.28e-09
ENSG00000225151	GOLGA2P7	2.0076	0.00197065		ENSG00000265055	AC145343.1	2.71976	3.66e-06
					ENSG00000019102	VSIG2	2.71686	2.81e-06
					ENSG00000180739	S1PR5	2.71623	0.000136589
					ENSG00000231160	KLF3-AS1	2.71348	2.8e-10
					ENSG00000141524	TMC6	2.70391	6.78e-06
					ENSG00000169856	ONECUT1	2.70049	8.12e-07
					ENSG00000235961	PNMA6A	2.68083	0.011196
					ENSG00000135414	GDF11	2.67912	1.05e-11
					ENSG00000166840	GLYATL1	2.67703	0.00011288
					ENSG00000168077	SCARA3	2.67525	7.9e-12
					ENSG00000256984	AC008013.3	2.67488	6.17e-05
					ENSG00000142677	IL22RA1	2.67025	2.87e-06
					ENSG00000154358	OBSCN	2.6689	5.26e-10
					ENSG00000035664	DAPK2	2.66111	1.94e-10
					ENSG00000154856	APCDD1	2.65687	3.96e-12
					ENSG00000073670	ADAM11	2.6535	0.00234001
					ENSG00000106689	LHX2	2.64316	8.53e-09
					ENSG00000284634	AC092821.4	2.64268	4.39e-13
					ENSG00000062524	LTK	2.63672	2.58e-07
					ENSG00000110975	SYT10	2.63245	1.44e-09
					ENSG00000019186	CYP24A1	2.62997	1.21e-08
					ENSG00000164061	BSN	2.62916	2.2e-11
					ENSG00000189410	SH2D5	2.62795	3.99e-05
					ENSG00000028137	TNFRSF1B	2.60585	8.33e-05
					ENSG00000177989	ODF3B	2.60486	0.000876564
					ENSG00000149260	CAPN5	2.60379	2.95e-10
					ENSG00000142303	ADAMTS10	2.60115	2.37e-12
					ENSG00000261371	PECAM1	2.6001	1.33e-07
					ENSG00000065717	TLE2	2.58887	8.2e-11
					ENSG00000127561	SYNGR3	2.5806	3.71e-05
					ENSG00000087495	PHACTR3	2.57895	6.07e-10
					ENSG00000141469	SLC14A1	2.57011	0.00194165
					ENSG00000099864	PALM	2.56491	7.6e-12
					ENSG00000124019	FAM124B	2.54854	9.27e-09
					ENSG00000144730	IL17RD	2.54255	3.62e-07
					ENSG00000163013	FBXO41	2.53553	4.77e-12
					ENSG00000204991	SPIRE2	2.52697	1.33e-11
					ENSG00000115257	PCSK4	2.52208	1.94e-06
					ENSG00000147862	NFIB	2.51644	2.33e-05
					ENSG00000162913	OBSCN-AS1	2.51192	0.000558587
					ENSG00000102882	MAPK3	2.50566	3.71e-10
					ENSG00000181378	CFAP65	2.50506	0.00857498
					ENSG00000255557	AP001266.2	2.49747	1.81e-09
					ENSG00000162591	MEGF6	2.49704	2.93e-10
					ENSG00000164669	INTS4P1	2.49527	3.73e-10
					ENSG00000189350	TOGARAM2	2.49157	3.71e-05
					ENSG00000113645	WWC1	2.48949	5.15e-11
					ENSG00000008300	CELSR3	2.4882	7.32e-09
					ENSG00000225826	LINC00626	2.48438	3.85e-05
					ENSG00000198794	SCAMP5	2.45822	3.73e-05
					ENSG00000225879	AL513210.1	2.4552	3.79e-05
					ENSG00000205309	NT5M	2.45422	3.7e-07
					ENSG00000254510	AP001107.5	2.45366	2.05e-07
					ENSG00000105559	PLEKHA4	2.45222	4.38e-10
					ENSG00000112139	MDGA1	2.45115	3.99e-07
					ENSG00000196074	SYCP2	2.45082	1.73e-12
					ENSG00000167799	NUDT8	2.44908	4.55e-07
					ENSG00000142552	RCN3	2.43548	4.81e-11
					ENSG00000130775	THEMIS2	2.42813	9.49e-09
					ENSG00000183145	RIPPLY3	2.42571	0.000119877
					ENSG00000158292	GPR153	2.42384	1.21e-10
					ENSG00000231784	DBIL5P	2.42345	0.000354526
					ENSG00000165633	VSTM4	2.42324	1.36e-11
					ENSG00000118513	MYB	2.41726	3.17e-11
					ENSG00000188095	MESP2	2.4157	4.57e-07
					ENSG00000069493	CLEC2D	2.41405	4.63e-12
					ENSG00000143147	GPR161	2.40049	1.75e-12
					ENSG00000241288	LINC02614	2.39914	2.91e-07
					ENSG00000123685	BATF3	2.39272	1.41e-06
					ENSG00000174482	LINGO2	2.3883	2.77e-10
					ENSG00000175048	ZDHHC14	2.38238	3.27e-11
					ENSG00000226891	LINC01359	2.37627	1.9e-09
					ENSG00000240086	AC092969.1	2.36309	1.79e-08
					ENSG00000198929	NOS1AP	2.35955	2.85e-10
					ENSG00000164484	TMEM200A	2.3593	0.000102508
					ENSG00000254363	AC011379.2	2.35699	4.27e-07
					ENSG00000198203	SULT1C2	2.35197	0.000236484
					ENSG00000165124	SVEP1	2.34881	6.96e-08
					ENSG00000245614	DDX11-AS1	2.34809	1.02e-11
					ENSG00000184371	CSF1	2.34553	9.91e-12
					ENSG00000135902	CHRND	2.34174	0.00117441
					ENSG00000011332	DPF1	2.33486	2.34e-08
					ENSG00000137825	ITPKA	2.33298	2.65e-07
					ENSG00000223572	CKMT1A	2.33239	0.00374102
					ENSG00000011201	ANOS1	2.32932	6.25e-11
					ENSG00000241684	ADAMTS9-AS2	2.32566	5.23e-11
					ENSG00000156689	GLYATL2	2.31716	8.86e-10
					ENSG00000247157	LINC01252	2.30949	0.000772684
					ENSG00000197444	OGDHL	2.30902	1.31e-06
					ENSG00000173200	PARP15	2.3078	4.91e-09
					ENSG00000206557	TRIM71	2.30508	0.000303711
					ENSG00000110492	MDK	2.30321	1.07e-10
					ENSG00000136848	DAB2IP	2.29734	8.35e-11
					ENSG00000153012	LGI2	2.29458	7.66e-05
					ENSG00000136378	ADAMTS7	2.28744	5.98e-05
					ENSG00000196876	SCN8A	2.28437	1.32e-09
					ENSG00000132321	IQCA1	2.28211	2.3e-08
					ENSG00000167100	SAMD14	2.2763	9.77e-08
					ENSG00000100626	GALNT16	2.27521	3.2e-10
					ENSG00000077942	FBLN1	2.27201	8.49e-08
					ENSG00000241884	AC114401.1	2.27093	4.9e-05
					ENSG00000174417	TRHR	2.27009	1.18e-08
					ENSG00000143494	VASH2	2.26741	4.9e-12
					ENSG00000105255	FSD1	2.26202	0.00304004
					ENSG00000174672	BRSK2	2.25897	9.26e-06
					ENSG00000238042	LINC02257	2.25787	3.06e-09
					ENSG00000100068	LRP5L	2.25397	6.82e-07
					ENSG00000226887	ERVMER34-1	2.25163	4.47e-05
					ENSG00000159674	SPON2	2.25109	2.43e-06
					ENSG00000204131	NHSL2	2.24617	0.000157438
					ENSG00000110900	TSPAN11	2.22804	2.23e-09
					ENSG00000267452	LINC02073	2.22647	4.12e-05
					ENSG00000108813	DLX4	2.22582	8.73e-09
					ENSG00000183775	KCTD16	2.22408	9.53e-09
					ENSG00000239774	AC125618.2	2.22081	2.69e-09
					ENSG00000099377	HSD3B7	2.21663	0.000851795
					ENSG00000055118	KCNH2	2.21301	0.00550833
					ENSG00000171791	BCL2	2.20621	5.67e-10
					ENSG00000232436	AL360013.2	2.20428	2.35e-07
					ENSG00000106852	LHX6	2.2001	9.47e-09
					ENSG00000151773	CCDC122	2.19981	1.08e-11
					ENSG00000130475	FCHO1	2.19865	0.000139274
					ENSG00000136425	CIB2	2.19748	7.99e-10
					ENSG00000101638	ST8SIA5	2.19478	1.84e-07
					ENSG00000162039	MEIOB	2.19447	4.27e-07
					ENSG00000167994	RAB3IL1	2.19127	4.32e-06
					ENSG00000134352	IL6ST	2.18049	1.73e-12
					ENSG00000215483	LINC00598	2.17064	9.31e-10
					ENSG00000143434	SEMA6C	2.16915	5.27e-11
					ENSG00000075035	WSCD2	2.16763	1.92e-07
					ENSG00000181585	TMIE	2.16735	0.000830167
					ENSG00000143590	EFNA3	2.16706	2.77e-05
					ENSG00000188517	COL25A1	2.16297	7.75e-06
					ENSG00000237880	LINC01885	2.16184	1.54e-11
					ENSG00000143061	IGSF3	2.1603	3.43e-09
					ENSG00000110042	DTX4	2.15973	2.38e-08
					ENSG00000174938	SEZ6L2	2.14897	2.57e-05
					ENSG00000239887	C1orf226	2.13879	0.000140707
					ENSG00000172554	SNTG2	2.13286	7.39e-07
					ENSG00000170396	ZNF804A	2.13148	2.56e-07
					ENSG00000164120	HPGD	2.12474	0.00795747
					ENSG00000137809	ITGA11	2.11888	2.42e-12
					ENSG00000166405	RIC3	2.11262	0.00014978
					ENSG00000162676	GFI1	2.1095	1.42e-07
					ENSG00000215788	TNFRSF25	2.10905	8.67e-06
					ENSG00000138829	FBN2	2.10821	6.6e-12
					ENSG00000176619	LMNB2	2.10313	3.58e-12
					ENSG00000143512	HHIPL2	2.09594	2.22e-07
					ENSG00000178531	CTXN1	2.09593	3.06e-05
					ENSG00000273143	AL355512.1	2.08995	5.73e-06
					ENSG00000179588	ZFPM1	2.08919	4.89e-07
					ENSG00000148832	PAOX	2.06727	0.000171901
					ENSG00000075275	CELSR1	2.04818	4.68e-09
					ENSG00000088899	LZTS3	2.02953	4.78e-10
					ENSG00000034239	EFCAB1	2.02137	0.00210167
					ENSG00000006468	ETV1	2.02081	3.28e-05
					ENSG00000173991	TCAP	2.01822	0.000696325
					ENSG00000238098	ABCA17P	2.01397	9.87e-05
					ENSG00000153885	KCTD15	2.00923	3.81e-09
					ENSG00000229848	AC139149.1	2.00326	0.0133823
					ENSG00000158445	KCNB1	2.00178	5.86e-06
