# Supplementary material
Source: HighWire-hosted journal article supplement (doi:10.1101/rna.078872.121)
Supplement: Supplemental_file2.xlsx [file Supplemental_file2.xlsx]

## Sheet: Sheet1
GU-rich Motif							G-rich Motif
Gene Name	Position in UTR	E-value	5' of motif	motif	3' of motif		Gene Name	Position in UTR	E-value	5' of motif	motif	3' of motif
MPP2-201	1151	9.57e-10	GTGCACGTGC	GTGTGTGTGTGTGTG	TGTCAGGTTT		NPAS4-201	141	3.66e-09	GCAGGATTTT	GGGGGGGGGGAGGTGGGAGGG	CAAGGGAGGG
PDZD4-201	75	9.57e-10	TATAGAGATT	GTGTGTGTGTGTGTG	TGCGCGCGCG		MEX3A-202	1909	2.44e-08	GGGCAGGTGG	GGAGGGGGGTGGGAAGAAGGG	ATGTCTGTCT
LSM14A-203	422	9.57e-10	GTGTGTGTGT	GTGTGTGTGTGTGTG	TGTGTATGTG		LRRC20-201	88	5.2e-08	AGGCCAAGCC	TGGGGGCTGGGGGCGGGTGGG	CCGAGCAGCA
STX1B-201	705	9.57e-10	GGGTGTGCAT	GTGTGTGTGTGTGTG	TGTGTGTGTG		PDZD4-201	622	5.2e-08	GGGAGTTGGG	GAGGAAGAGTGGGAGGGAGGG	CTGGGGATGG
MATN1-201	186	9.57e-10	GTGCATGTGT	GTGTGTGTGTGTGTG	TGTGCACGTG		DES-201	616	8.92e-08	GTGAGATGCT	GGAGAAGAGAGGAGAGGAGAG	AGGCAGAGAG
KIFC1-211	47	9.57e-10	GTGTGTGTGT	GTGTGTGTGTGTGTG	TGTCCCTATG		ALPI-201	1095	1.26e-07	GGGCTGGATC	AGAGGGGTGGGGGTGGGTGGG	CAGAGTGGGG
RASL12-201	1459	2.03e-09	CAGGCCACTT	GTGTGTGTATGTGTG	TGTGTACCAC		DLG3-203	1912	2.09e-07	CTGTGACTCT	GGTGAGGAGGGGTGAGCAGGG	AGGTTGATTC
SLC7A2-204	238	1.87e-08	CAGTGGGAGT	GTGTATGTATGTGTG	TATGTATGTA		RND2-202	133	2.46e-07	TTCTGGGCAG	GGGAGCTGGAGGGCAGAAGGG	TATCATCGTT
LYPD6-201	3073	1.99e-08	TAAAAATTAT	GTGTGTATGTGTATG	TATATATATA		SEMA3G-201	1342	2.46e-07	CTCAGGCTGG	GGAGCACAGAGGGGAGGAGGA	GGACTAAATG
LOX-201	1121	4.44e-08	TCAGTCACAC	ATGTGTGTGTGTCTG	AGATATAGTC		PROM2-201	1042	3.96e-07	TTCCAGAAAT	GAGGAAGAGGAGAGAGAAGAG	ATGGACAGAC
							DISP2-201	8002	5.39e-07	TGAGATGATG	GGGTGGGTGGGGTAGGCAGAA	AGAGGAGGAT
							TMEM200B-202	1307	5.39e-07	CGGTGGAGGG	GGGGGTGGGGACGGGGATGGG	TCACGGGGCC
							GLO1-201	581	5.39e-07	TTATTTATTT	GGGAAAGGGGAGGAGGAAGGA	AATGATATGG
							F2RL3-201	1875	5.39e-07	GTGGGACAAT	GGGGGGTGGGGGTGGACAGTG	TGTGCTGGGG
							ARL10-201	199	7.28e-07	AAGCCGAAGC	AGGGAGGTGGGTGAGACAGAG	GGTGGGGAGG
							CIITA-214	922	7.28e-07	GGACACTAAT	GGGGCGGTGAGAGGGGAACAG	ACTGGAAGCA
							STMN3-201	450	7.28e-07	CCCATGAGGG	AGGGGCGACGGGGGAGGGGGG	TGATGGTGCC
							B4GAT1-201	550	8.44e-07	TCGCCTTCAA	GGGTTCTGGAGGAGGGAAGGG	TCTGCAGGTT
							PDE2A-201	606	9.76e-07	CTGCAGAGAG	GGGCCCTGGGGAGAAGCAGGA	TGGGATTGAT
							MPP2-201	775	9.76e-07	AGCCCAGGTA	GGGGCAGGATGGAGGGCTGAG	CCCTGTGACA
							DUSP2-201	434	1.13e-06	TGGGGAAGCT	GGGGACTTGGGAAGTGATGGG	TGTGTCATGT
							SRRM3-204	1166	1.13e-06	TACAGCCCTC	AGAAGGGAGGGGAGGAAAGAG	ACTGAGGGCC
							EFNB3-201	998	1.3e-06	GCTTAGTCTG	GGGGATCAGGAGGTGGGAGGT	GGATGGTTCT
							DACT3-202	529	1.72e-06	GTCCCTGCAG	AGTGCCCTGGGAAGGGAAGGA	GCACTGATTT
							PRSS36-201	173	1.97e-06	GGAATCCTTG	GGGGTGGTGGGAGGAGCGGAC	AATAAAGGTG
							RASL12-201	1206	1.97e-06	GGAAAAGAGA	GGGTCCTGGTGGGTGGAAGGA	TTGGGAAGGG
							CHDH-201	2657	1.97e-06	CTGATGGAAT	AGGGGATAGGGGTGGGCTGTG	TGGGAGCCAA
							P4HA3-201	233	2.26e-06	AGTACAAAGG	AGGGGGGAGTGGAGGCCTGAG	AGGGAAGTTT
							SH2D7-201	1308	2.26e-06	AAGGAGGCCG	GGAGAAGGGGAACAGGCAGGG	GTGGGAAGCA
							SPTBN4-212	501	2.26e-06	GATCTCTGTC	TGGGAGGGGGGAGTGAAGGGG	CCCTAGCCCC
							SHFL-201	259	3.37e-06	AATGTCCTCT	AGGGCCTAGGGGACAGAGGAA	CACAGAGTCA
							SLC43A3-201	289	3.37e-06	CTCCAGGGGA	GATGACCTGGGGGAGGAAGTG	TGTCAACTAT
							ARHGAP45-201	421	3.83e-06	TCTGGGAGCC	GTGGATGGGGGCGGAGCTGGG	GTTTGGTGCA
							RBM38-203	1304	3.83e-06	GTATCCTGGC	CGAGGGCGGGGGGCAGCGGGG	GGTCTCCCTC
							CILP2-201	496	4.36e-06	GGGTCCAGGC	TGGGCCCAGTGAAAAGGAGGA	AGGGGTTCCC
							SIX3-201	1098	4.36e-06	GGAGAGGCAT	GGTGGCCTGGGTTAGGAAGAG	GGACCCTGTC
							MATN1-201	862	4.36e-06	TTACAGGGCA	ATGGCGGTGGGGGGGGATGGT	GCTGTATGAG
							NWD1-201	1098	4.95e-06	GCACCTGGGT	GAGCAGCAGGGAGAGACAGAG	ACTGGACATG
							PRX-202	87	5.61e-06	CTAACCCTAA	GAGGGCCGGGAGGTGGGTGAC	TGACCAGGGC
							HMX2-201	267	6.36e-06	AGATGTTCTC	GGGTGGTGGTGGGAAAGGGAG	TTTTGGCCAG
							LRRC3-201	2447	6.36e-06	ACCTCCTGCT	GGGAGGAGGAGATGGGGAGAG	GACCAGGAGG
							C1QL4-201	169	6.36e-06	CAAGGGTATA	AGTGGCCGGGAAGAGGAGGAG	ACCCGGCCAG
							THNSL2-201	178	7.19e-06	GGTCACCAGG	GAGGCTGAGTGAGGGGCTGTG	AACAGTTGCC
							SIX2-201	600	7.19e-06	AGTAGGGGGT	GGGAGAGGGAAGAGGAGAGAA	AATACAGGGA
							GBX2-201	655	7.19e-06	TAATAAAAAG	GAGAGAGGGGGGGAAAAAGAC	CAA
							KIFC1-211	87	7.19e-06	GTATCGGGTG	AGGGGTGGGAGGGTTGCTGGA	GGGTGCTTTA
							ZNF469-202	195	8.12e-06	CTTTCTTGCT	GGAAGGCTGGGGGTGAAAGAC	GGGGCCACTG
							DDN-201	329	9.15e-06	GGCAGCCATA	GGAGGGCAGGGTAGGGTAGGG	CCTCTGAGGA
							USP51-201	199	9.15e-06	ATTCAACCTT	AAGAAATGGGGAGAGGGAGAA	GAGGTTGAAA
							CNIH2-201	82	1.03e-05	CGCAGAGGCC	TCAGCCCTGGGGAGGGAGGGG	GCACTGGTGC
							LYPD6-201	1984	2.05e-05	GTGGGATGAT	GTGGGATTGAAGAGGAAAGAA	AGGTGGGATT
							CHST14-201	173	2.05e-05	ACAGTGACTC	AGAGGACAGGGCTAGGCAGGA	GACCTGCTGC
							YPEL3-202	150	2.55e-05	TGCATGCACT	GTGACCTTGGGGGGAGAACAG	AAGGGGGACG
							CD6-201	501	3.17e-05	CACTGATCGG	TGGGCGCTGGGGGGGTAGGGT	AGCACACCAG
							KCNH3-201	248	3.17e-05	CTGGGGGCAG	AGGCCTGAGGACAAGGAAGAG	CTTTGCCATC
							GPR137C-201	194	3.17e-05	AATGGAAAGT	TTGGAGTAGGAGAAAAGAGAG	ATTAGATCTT
							UCK1-204	1123	3.17e-05	GTGATGCAGA	CGTGACGTGGGGGAAGGGGGC	TGAGCCCTGT
							RAB39B-201	151	3.17e-05	ACTCGTGTGC	GGGTGGATGGGGGTGCCTGAG	TGCTGTGACC
							WNT5B-202	299	3.17e-05	GCCTGGAGGA	GGGAGGTTGTGGTTGGATGGA	GGAGATGATC
							STX1B-201	2080	3.17e-05	GCAGGTAGGT	GGTGCGTGGGAGAAAGGACAG	TGTTAGAGGT
							ROBO3-201	30	4.34e-05	AATATCATGA	GTGCCACGGGGAAGGGGAGTA	GGGATGTCTT
							PNMA2-204	1322	4.81e-05	GGCAACAAAG	GATGAAGAGGAGAGAAAAGGA	ACTCACATTT
							TIGD3-201	108	5.32e-05	TAGAACTGTC	GTAAAGGTGTAGAAGGGAGAG	AAGTTGGGAC
							IL27RA-201	98	5.89e-05	ATGAAGACAC	TGAGGACTCAGAGAGGCTGAG	TCACTTACCT
							RAPGEF3-201	252	5.89e-05	GAGGCCCCAG	GAGTGGGTGGAGAGTGGAGTG	CGCTGGGACG
							LOX-201	1538	7.18e-05	GCATGGTTAG	AGGGGCTAGAGATGGACAGTC	ATCAACTGGC
							SLC7A2-204	1157	9.59e-05	GCAAAGAGGG	AAAGATGAAGGGATAGAAGAA	GAGAAAATCC
							DPYSL4-201	479	0.000105	GTGCCCATCG	CAGGCCTGGGAGGAAAGTGGG	CGCAGAGCCC
							FST-201	762	0.000105	GAAATGATGT	GGGTGTCAGGAGACTAAAGGA	TGTTGAAGGC
