# Supplementary material
Source: HighWire-hosted journal article supplement (doi:10.1101/rna.078872.121)
Supplement: Supplemental_file3.xlsx [file Supplemental_file3.xlsx]

## Sheet: Assay information
TaqMan assays used in this study
Gene	Use	Assay ID	Amplicon (bp)	Forward (5'-3')	Reverse (5'-3')
KIFC1	gene of interest	Hs00382558_m1	63	N/A	N/A
EFNB3	gene of interest	Hs00154861_m1	74	N/A	N/A
HOTAIR	gene of interest	Hs03296496_m1	69	N/A	N/A
EMILIN3	gene of interest	Hs01377845_m1	82	N/A	N/A
GRM2	gene of interest	Hs00968358_m1	72	N/A	N/A
ZNF853	gene of interest	Hs01381243_m1	90	N/A	N/A
TP73	gene of interest	Hs01056231_m1	65	N/A	N/A
GLO1	gene of interest	Hs00198702_m1	90	N/A	N/A
NID1	gene of interest	Hs00915875_m1	57	N/A	N/A
NUDT15	gene of interest	Hs01087148_m1	64	N/A	N/A
XRN1	gene of interest	Hs00943063_m1	110	N/A	N/A
XRN2	gene of interest	Hs01082225_m1	170	N/A	N/A
DIS3L2	gene of interest	Hs04966835_m1	86	N/A	N/A
DIS3L1	gene of interest	Hs00370241_m1	60	N/A	N/A
DIS3	gene of interest	Hs0020014_m1	110	N/A	N/A
GAPDH	housekeeper	Hs02786624_g1	157	N/A	N/A
HPRT1	housekeeper	Hs02800695_m1	82	N/A	N/A
PES1	housekeeper	Hs00897727_g1	109	N/A	N/A
18S rRNA	housekeeper	Hs99999901_s1	187	N/A	N/A
pre-XRN1	gene of interest	Custom	88	ACGGGCCTGTCTTCAGAAAATATG	CCTGAACATAACATGCAGCTTGATC
