# Supplementary material
Source: HighWire-hosted journal article supplement (doi:10.1101/rna.078872.121)
Supplement: Supplemental_Table_1.docx [file Supplemental_Table_1.docx]

| **Sample ID** | **Sex (if disclosed)** | **Location of biopsy resection** | **Histological features** |
| --- | --- | --- | --- |
| 10/196 | Unknown | Right scapula | Pleiomorphic cells, large cytoplasm and prominent nucleoli. Cells are irregular and osteoid formation is evident. Strong alkaline phosphatase staining – high levels of calcification. |
| 10/10034 | Female | Left femur | Dense population of nuclear pleiomorphic cells within bony trabecular. Osteoid deposition by abnormal cells, scattering of normal osteoblasts and osteoclasts within. |
| 11/650 A, B & C | Unknown | Lung metastasis | All specimens show lung with nodules of tumour made up of spindle cells, marked nuclear pleiomorphism and mitoses. Marked osteoid matrix formation. |
| 12/299 | Unknown | Pelvis | Variable cellularity, with nests of cells displaying size and cytoplasm variability. Some pleiomorphic, multinucleated, giant cells. No evidence of osteoid. Described as chondroblastic OS. |
| 16/496 | Unknown | Right, proximal humerus | Severely pleiomorphic, hyperchromatic nuclei. Formation of malignant osteoid. Lytic lesion. |
| 16/509 | Unknown | Right distal femur | Some cells have intermediate-sized, round nuclei, others are pleiomorphic. Scattered giant cells also seen. Formation of osteoid. |
| 16/528 | Unknown | Right distal femur | Pleiomorphic cells with large amounts of cytoplasm. Large amount of osteoid production. |
| 16/572 | Unknown | Left distal femur | Trabecular bone infiltrated by bone-forming tumour. Viable tumour cells have plump pleiomorphic nuclei. |
| 16/632 | Unknown | Right proximal humerus | Fragments of bone-forming tumour. Small foci of cartilaginous matrix also identified. Cells have plump nuclei with mild pleiomorphism. |
| 16/755 | Unknown | Right femoral neck | Malignant neoplasm with sheets of pleiomorphic, ovoid and fusiform cells. Evidence of osteoid formation. |
| 16/760 | Unknown | Left proximal humerus | Trabecular bone infiltrated by tumour. Formation of malignant osteoid which is partly coarse, partly delicate, produced by plump pleiomorphic cells. |

**Supplemental Table 1: Patient OS biopsy sample description.** Samples were released by the Children’s Cancer and Leukaemia Group (CCLG) and sample details are outlined in Supplemental Table 1. Samples 11/650, 12/299 and 16/755 displayed large necrosis of the sample, and so were not included in analysis. Details of sample 16/591 were not disclosed.
